# Supplementary material for: Differentially Expressed MicroRNAs in Chondrocytes from Distinct Regions of Developing Human Cartilage
Source: PLoS One. 2013 Sep 9;8(9):e75012. doi: 10.1371/journal.pone.0075012 (PMC3767648; doi:10.1371/journal.pone.0075012)
Supplement: Table S4 — Genes predicted to be targeted by one or more miRNAs identified in Table 4 as being more highly-expressed in HYP compared to DC cells. (XLSX) [file pone.0075012.s005.xlsx]

## Sheet: DC_less_than_HYP
Developmental Pathways	P-Value	Target Genes in Pathway
TGF-β receptor signaling	1.252e-07	CDC27,CAV1,ETV1,FKBP1A,KPNB1,MAP2K1,RPS6KA5,ZFYVE9,SMAD7,SP1,SKI,TGFBR1,TGFBR2,KLF10,CDKN1A
FGF receptor signaling	3.583e-07	AKT3,CREB1,CRK,ABI1,EPS8,FRS2,GAB1,MAPK9,MAP2K1,MAP3K11,PDPK1,PIK3R3,PRKCD,UBC
WNT5a signaling	2.962e-06	CAMK2G,PPP3CA,PPP3R1,CALM1,FZD4,GNB5,GNG2,MAPK9,MAP3K10,MAP3K11,NLK,PLCB1,PRKG1,TCF7L1
IGF-1 receptor signaling	9.252e-06	YWHAB,AKT3,MAP3K5,CREB1,CCND1,CCND2,M6PR,IRS2,MAP2K1,PDPK1,PIK3R3,PTEN,RPS6KA1,RPS6KA3
Role of IL-8 in angiogenesis	2.076e-05	AKT3,CARD11,CAV1,GNB5,GNG2,IL8,MAP2K1,MMP14,PDPK1,MBTPS1,STAT3,UBC,VEGFA,FOS
Role of activin A in cell differentiation and proliferation	2.452e-05	ACVR1B,ACVR2A,ACVR2B,ADCY1,ADCY9,CREB1,MXD1,PKNOX1,PRKACB,SF1,SP1,CDKN1A
Hedgehog signaling	8.933e-05	CDON,CSNK1G1,CSNK1G3,FBXW11,CUL3,ADRBK1,HSP90B1,ITCH,MAP3K10,PRKACB,UBC
